# Supplementary material for: Identification of a Gait Pattern for Detecting Mild Cognitive Impairment in Parkinson’s Disease
Source: MDPI journal article supplement (doi:10.3390/s23041985), 2023-02-10
Supplement: s1 [file s1]

## Article

# Identification of a Gait Pattern for Detecting Mild Cognitive Impairment in Parkinson's Disease

Michela Russo <sup>1</sup>, Marianna Amboni <sup>2,3</sup>, Paolo Barone <sup>2</sup>, Maria Teresa Pellecchia <sup>2</sup>, Maria Romano <sup>1</sup>, Carlo Ricciardi <sup>1,\*</sup> and Francesco Amato <sup>1,†</sup>

<sup>1</sup> Department of Electrical Engineering and Information Technology, University of Naples Federico II, 80125 Naples, Italy

<sup>2</sup> Department of Medicine, Surgery and Dentistry, Scuola Medica Salernitana, University of Salerno, 84081 Baronissi, Italy

<sup>3</sup> IDC Hermitage Capodimonte, 80133 Naples, Italy

\* Correspondence: carlo.ricciardi@unina.it

† These authors contributed equally to this work.

Table S1. Clinical-demographic features of PD patients with mild cognitive impairment (PD-MCI) belong to internal dataset and external dataset (mean  $\pm$  standard deviation).

| Variables        | PD-MCI/Internal dataset<br>(sample size=31) |        | PD-MCI/External dataset<br>(sample size=9) |        | p-value |
|------------------|---------------------------------------------|--------|--------------------------------------------|--------|---------|
|                  | Mean                                        | SD     | Mean                                       | SD     |         |
| Age              | 66.20                                       | 8.50   | 71.33                                      | 7.57   | 0.106   |
| BMI              | 28.30                                       | 3.98   | 28.91                                      | 4.49   | 0.524   |
| Disease Duration | 5.41                                        | 2.44   | 3.83                                       | 1.77   | 0.167   |
| LEDD             | 576.60                                      | 378.91 | 718.13                                     | 576.98 | 0.825   |
| Hoehn & Yahr     | 1.95                                        | 0.30   | 2.06                                       | 0.17   | 0.406   |
| MDS-UPDRS-TOT    | 43.03                                       | 8.85   | 44.11                                      | 7.22   | 0.276   |

\*Significance level at 0.05.

Table S2. Clinical-demographic features of PD patients without mild cognitive impairment (PD-noMCI) belong to internal dataset and external dataset (mean  $\pm$  standard deviation).

| Variables        | PD-noMCI/Internal dataset<br>(sample size=29) |        | PD-noMCI/External dataset<br>(sample size=11) |        | p-value |
|------------------|-----------------------------------------------|--------|-----------------------------------------------|--------|---------|
|                  | Mean                                          | SD     | Mean                                          | SD     |         |
| Age              | 61.32                                         | 8.10   | 63.55                                         | 11.19  | 0.417   |
| BMI              | 26.98                                         | 3.09   | 24.48                                         | 3.31   | 0.272   |
| Disease Duration | 4.74                                          | 2.64   | 4.18                                          | 3.10   | 0.369   |
| LEDD             | 554.81                                        | 442.98 | 569.55                                        | 569.24 | 0.550   |
| Hoehn & Yahr     | 1.76                                          | 0.41   | 1.90                                          | 0.17   | 0.196   |
| MDS-UPDRS - TOT  | 35.45                                         | 11.65  | 41.55                                         | 18.15  | 0.308   |

\*Significance level at 0.05.

**Citation:** Russo, M.; Amboni, M.; Barone, P.; Pellecchia, M.T.; Romano, M.; Ricciardi, C.; Amato, F. Identification of a Gait Pattern for Detecting Mild Cognitive Impairment in Parkinson's Disease. *Sensors* **2023**, *23*, 1985. <https://doi.org/10.3390/s23041985>

Academic Editor: Giovanni Saggio

Received: 9 December 2022

Revised: 4 January 2023

Accepted: 7 February 2023

Published: 10 February 2023

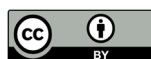

**Copyright:** © 2023 by the authors. Licensee MDPI, Basel, Switzerland. This article is an open access article distributed under the terms and conditions of the Creative Commons Attribution (CC BY) license (<https://creativecommons.org/licenses/by/4.0/>).

Table S3. Confidence interval for accuracy, sensitivity, specificity and precision of each algorithm.

| Task GAIT          |          |      |                |      |                |
|--------------------|----------|------|----------------|------|----------------|
| Evaluation metrics | Dataset  | RF   | CI             | KNN  | CI             |
| Accuracy           | Internal | 55.0 | 43.0% to 67.7% | 61.7 | 49.0% to 72.9% |
|                    | External | 65.0 |                | 57.1 |                |
| Sensitivity        | Internal | 54.8 | 35.1% to 68.0% | 67.7 | 46.9% to 78.8% |
|                    | External | 90.0 |                | 70.0 |                |
| Specificity        | Internal | 58.6 | 41.7% to 75.4% | 58.6 | 40.7% to 74.5% |
|                    | External | 40.0 |                | 45.5 |                |
| Precision          | Internal | 57.1 | 39.0% to 74.5% | 62.5 | 45.3% to 77.1% |
|                    | External | 60.0 |                | 53.8 |                |

  

| Task MOT           |          |      |                |      |                  |
|--------------------|----------|------|----------------|------|------------------|
| Evaluation metrics | Dataset  | RF   | CI             | DT   | CI               |
| Accuracy           | Internal | 63.3 | 47.3% to 71.4% | 63.3 | 51.6% to 0.74.4% |
|                    | External | 70.0 |                | 61.9 |                  |
| Sensitivity        | Internal | 61.3 | 40.7% to 73.6% | 51.6 | 34.8% to 68.0%   |
|                    | External | 80.0 |                | 50.0 |                  |
| Specificity        | Internal | 65.5 | 44.0% to 77.3% | 75.9 | 57.9% to 87.8%   |
|                    | External | 60.0 |                | 72.7 |                  |
| Precision          | Internal | 65.5 | 44.0% to 77.3% | 69.6 | 49.1% to 84.4%   |
|                    | External | 66.7 |                | 62.5 |                  |

  

| Task COG           |          |      |                |      |                 |
|--------------------|----------|------|----------------|------|-----------------|
| Evaluation metrics | Dataset  | RF   | CI             | SVM  | CI              |
| Accuracy           | Internal | 70.0 | 55.8% to 78.7% | 73.3 | 55.8% to 78.7%  |
|                    | External | 71.4 |                | 66.7 |                 |
| Sensitivity        | Internal | 74.2 | 53.4% to 83.9% | 71.0 | 53.4% to 83.9%  |
|                    | External | 70.0 |                | 60.0 |                 |
| Specificity        | Internal | 65.5 | 47.3% to 80.1% | 75.9 | 57.8% to 87.8%  |
|                    | External | 72.7 |                | 72.7 |                 |
| Precision          | Internal | 69.7 | 51.4% to 82.0% | 75.9 | 57.8 % to 87.8% |
|                    | External | 70.0 |                | 66.7 |                 |

**Disclaimer/Publisher's Note:** The statements, opinions and data contained in all publications are solely those of the individual author(s) and contributor(s) and not of MDPI and/or the editor(s). MDPI and/or the editor(s) disclaim responsibility for any injury to people or property resulting from any ideas, methods, instructions or products referred to in the content.
